# Supplementary material for: Conformational Heterogeneity of Cyclosporin A in Cyclophilin 18 Binding
Source: PubMed Central journal article supplement (PMC4833397; doi:10.1371/journal.pone.0153669), 2016-04-15
Supplement: pone.0153669.s002.pdf [file pone.0153669.s002.pdf]

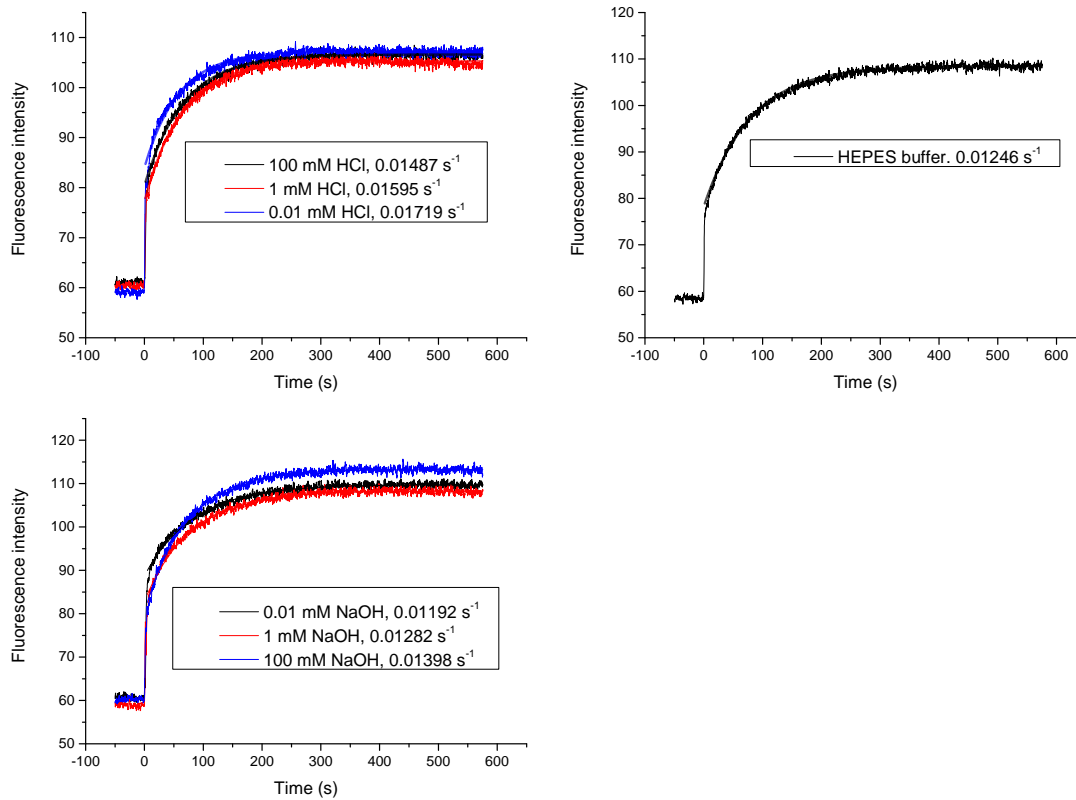

S2 Fig. Fluorescence intensity time courses of Cyp18 upon the addition of CsA dissolved in different pH under continuous stirring.
