# Supplementary material for: Conformational Heterogeneity of Cyclosporin A in Cyclophilin 18 Binding
Source: PubMed Central journal article supplement (PMC4833397; doi:10.1371/journal.pone.0153669), 2016-04-15
Supplement: pone.0153669.s003.pdf [file pone.0153669.s003.pdf]

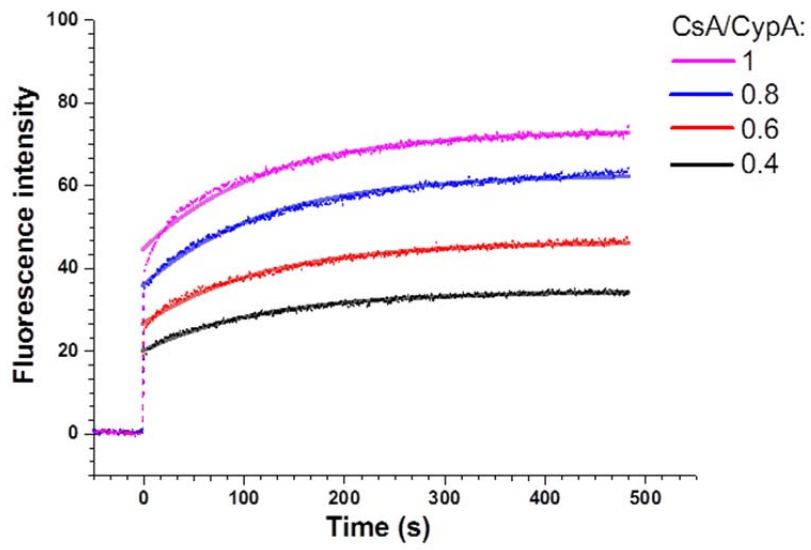

**S3 Fig. First order global fitting when CsA was not more than CypA.** The values shown in the inset represent the different ratios of CsA to CypA. The  $k$  value was  $8.25 \pm 0.03 \text{ s}^{-1}$ .
