# Supplementary material for: Conformational Heterogeneity of Cyclosporin A in Cyclophilin 18 Binding
Source: PubMed Central journal article supplement (PMC4833397; doi:10.1371/journal.pone.0153669), 2016-04-15
Supplement: pone.0153669.s004.pdf [file pone.0153669.s004.pdf]

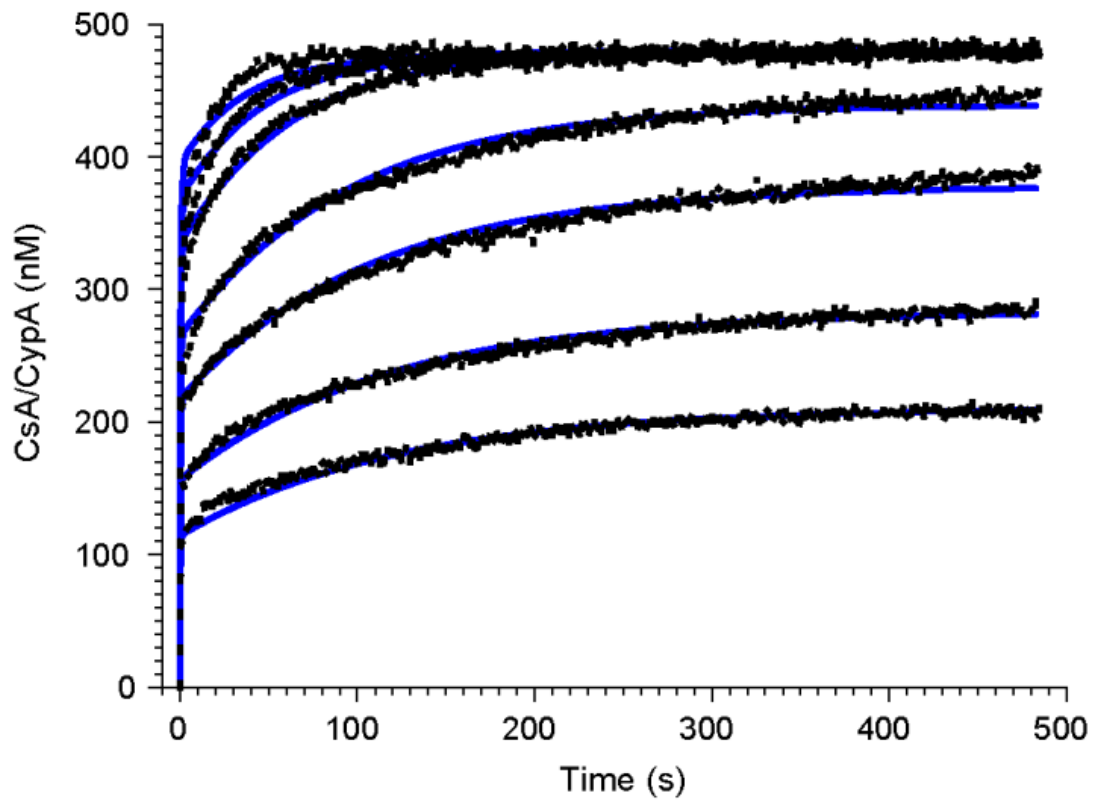

**S4 Fig. Time courses of CsA/Cyp18 complex forming.** Black curves are plotted by the data converted from Fig 1A (80.87 of fluorescence intensity was equaled to 500 nM CypA/CsA complex) and the blue curves are the global fitting curves using Berkeley modenna. The final parameters after fitting were shown in S2 Table (down numbers)
