# Supplementary material for: Conformational Heterogeneity of Cyclosporin A in Cyclophilin 18 Binding
Source: PubMed Central journal article supplement (PMC4833397; doi:10.1371/journal.pone.0153669), 2016-04-15
Supplement: pone.0153669.s005.pdf [file pone.0153669.s005.pdf]

**S1 Table. Fluorescence intensity of Cyp18 upon the binding of CsA.**

| <b>CsA/Cyp18</b> | <b>Fast<br/>increasement</b> | <b>Total<br/>increasement</b> | <b>Relative fast<br/>increasement (%)</b> |
|------------------|------------------------------|-------------------------------|-------------------------------------------|
| 5.0              | 83.30                        | 80.87                         | 103.00                                    |
| 1.6              | 53.26                        | 77.96                         | 68.32                                     |
| 1.4              | 49.75                        | 77.78                         | 63.96                                     |
| 1.2              | 47.82                        | 78.23                         | 61.13                                     |
| 1.0              | 36.98                        | 72.47                         | 51.03                                     |
| 0.8              | 34.20                        | 62.92                         | 54.36                                     |
| 0.6              | 23.32                        | 46.20                         | 50.47                                     |
| 0.4              | 17.68                        | 33.66                         | 52.53                                     |

Average  
52.10
